# Supplementary material for: Persistence of Schistosomiasis-Related Morbidity in Northeast Brazil: An Integrated Spatio-Temporal Analysis
Source: MDPI journal article supplement (doi:10.3390/tropicalmed6040193), 2021-10-28
Supplement: s1 [file s1]

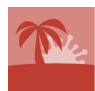

## Supplementary Information

**Table S1.** Number of tests performed and percentage of positivity for schistosomiasis according to state and year in the Northeast Region, Brazil. 2001-2017.

| State               | Examined (% of positivity) |                    |                    |                    |                    |                    |                    |                  |                  |                  |                  |                  |                  |                  |                  |                  |                  |
|---------------------|----------------------------|--------------------|--------------------|--------------------|--------------------|--------------------|--------------------|------------------|------------------|------------------|------------------|------------------|------------------|------------------|------------------|------------------|------------------|
|                     | 2001                       | 2002               | 2003               | 2004               | 2005               | 2006               | 2007               | 2008             | 2009             | 2010             | 2011             | 2012             | 2013             | 2014             | 2015             | 2016             | 2017             |
| Maranhão            | 53,227<br>(7.2)            | 72,622<br>(2.8)    | 128,186<br>(4.2)   | 138,045<br>(4.2)   | 171,976<br>(5.2)   | 187,701<br>(4.1)   | 134,078<br>(4.0)   | 90,640<br>(4.3)  | 111,879<br>(4.6) | 102,260<br>(5.0) | 93,640<br>(3.6)  | 93,236<br>(2.7)  | 81,033<br>(3.5)  | 82,691<br>(3.8)  | 69,340<br>(3.2)  | 45,747<br>(2.5)  | 43,606<br>(4.3)  |
| Piauí               | 8,257<br>(0.0)             | 472<br>(0.6)       | 627<br>(0.0)       | 2,236<br>(0.0)     | 132<br>(0.0)       | 6,276<br>(0.1)     | 6,841<br>(0.1)     | 5,426<br>(0.0)   | 0<br>(0.0)       | 2,189<br>(0.0)   | 0<br>(0.0)       |
| Ceará               | 103,526<br>(1.0)           | 94,627<br>(1.0)    | 48,150<br>(0.8)    | 42,150<br>(0.8)    | 43,573<br>(0.8)    | 62,907<br>(0.4)    | 62,040<br>(0.3)    | 47,684<br>(0.4)  | 53,925<br>(0.3)  | 41,497<br>(0.3)  | 29,316<br>(0.1)  | 32,798<br>(0.1)  | 26,091<br>(0.2)  | 26,498<br>(0.4)  | 15,727<br>(0.8)  | 0<br>(0.0)       | 0<br>(0.0)       |
| Rio Grande do Norte | 5,156<br>(0.7)             | 3,357<br>(1.2)     | 29,170<br>(4.8)    | 22,783<br>(2.8)    | 69,376<br>(7.9)    | 45,694<br>(3.7)    | 61,663<br>(3.8)    | 43,807<br>(3.2)  | 39,866<br>(4.5)  | 104,628<br>(2.7) | 37,267<br>(2.9)  | 22,295<br>(3.8)  | 34,684<br>(1.8)  | 25,671<br>(2.8)  | 10,611<br>(2.3)  | 3,727<br>(3.3)   | 11,612<br>(2.7)  |
| Paraíba             | 117,430<br>(5.0)           | 107,466<br>(5.4)   | 139,516<br>(5.4)   | 120,999<br>(4.9)   | 117,025<br>(5.1)   | 100,725<br>(4.7)   | 93,014<br>(5.4)    | 53,135<br>(6.8)  | 73,146<br>(6.7)  | 41,398<br>(5.0)  | 47,156<br>(5.1)  | 37,306<br>(5.6)  | 25,694<br>(7.9)  | 23,616<br>(10.2) | 0<br>(0.0)       | 0<br>(0.0)       | 0<br>(0.0)       |
| Pernambuco          | 7,644<br>(25.4)            | 18,564<br>(12.8)   | 32,059<br>(16.6)   | 29,434<br>(13.2)   | 70,676<br>(13.2)   | 101,286<br>(11.5)  | 124,070<br>(10.3)  | 88,987<br>(9.9)  | 96,756<br>(9.0)  | 98,665<br>(8.3)  | 103,961<br>(7.3) | 94,544<br>(5.6)  | 120,182<br>(5.4) | 257,417<br>(3.4) | 244,844<br>(3.0) | 190,453<br>(2.3) | 176,176<br>(2.5) |
| Alagoas             | 107,752<br>(16.5)          | 188,467<br>(12.9)  | 224,325<br>(13.2)  | 204,768<br>(10.2)  | 218,587<br>(9.6)   | 244,360<br>(8.7)   | 216,903<br>(8.1)   | 193,808<br>(8.4) | 185,538<br>(8.8) | 180,994<br>(7.3) | 177,655<br>(7.3) | 166,798<br>(6.8) | 174,090<br>(7.3) | 162,633<br>(6.0) | 158,806<br>(5.0) | 131,097<br>(5.0) | 148,242<br>(4.7) |
| Sergipe             | 53,052<br>(11.8)           | 70,518<br>(10.9)   | 95,055<br>(9.5)    | 92,252<br>(10.7)   | 112,771<br>(9.6)   | 141,457<br>(9.9)   | 131,235<br>(10.4)  | 79,858<br>(10.3) | 92,957<br>(8.8)  | 91,719<br>(9.6)  | 100,387<br>(8.5) | 18,070<br>(9.8)  | 50,614<br>(6.7)  | 47,058<br>(6.9)  | 61,485<br>(7.4)  | 29,159<br>(9.6)  | 39,776<br>(7.1)  |
| Bahia               | 354,111<br>(6.1)           | 876,269<br>(7.1)   | 717,730<br>(6.1)   | 624,394<br>(6.1)   | 505,664<br>(5.1)   | 465,929<br>(5.0)   | 405,405<br>(4.2)   | 293,567<br>(3.5) | 292,703<br>(3.7) | 251,217<br>(4.2) | 214,837<br>(3.3) | 128,832<br>(3.8) | 61,592<br>(2.8)  | 2,328<br>(2.6)   | 0<br>(0.0)       | 0<br>(0.0)       | 0<br>(0.0)       |
| Northeast region    | 810,140<br>(7.2)           | 1,432,362<br>(7.4) | 1,414,818<br>(7.2) | 1,277,061<br>(6.7) | 1,309,780<br>(6.7) | 1,356,335<br>(6.3) | 1,235,249<br>(6.0) | 896,912<br>(5.9) | 946,770<br>(5.9) | 914,567<br>(5.6) | 804,219<br>(5.4) | 593,879<br>(4.9) | 573,980<br>(5.2) | 627,912<br>(4.5) | 560,813<br>(4.0) | 400,183<br>(3.7) | 419,412<br>(3.9) |
